# Supplementary material for: Synthesis and Structural Characterization of Selenium Nanoparticles–Bacillus sp. MKUST-01 Exopolysaccharide (SeNPs–EPS) Conjugate for Biomedical Applications
Source: MDPI journal article supplement (doi:10.3390/biomedicines11092520), 2023-09-12
Supplement: s1 [file s1]

Supplementary File

## Synthesis and Structural Characterization of Selenium Nanoparticles – *Bacillus* sp. MKUST-01 Exopolysaccharide (SeNPs-EPS) Conjugate for Biomedical Applications

Thirumalaivasan Ramachandran <sup>1</sup>, Devaprakash Manoharan <sup>1</sup>, Sivakumar Natesan <sup>1,\*</sup>, Shyam Kumar Rajaram <sup>2</sup>, Ponmurugan Karuppiyah <sup>3</sup>, Mohammed Rafi Shaik <sup>4,\*</sup>, Mujeeb Khan <sup>4</sup> and Baji Shaik <sup>5</sup>

<sup>1</sup> Department of Molecular Microbiology, School of Biotechnology, Madurai Kamaraj University, Madurai 625021, Tamilnadu, India; thivasan7498@gmail.com (T.R.); devprakashm3@gmail.com (D.M.)

<sup>2</sup> Department of Biotechnology, Kamaraj College of Engineering and Technology, Virudhunagar 625701, Tamil Nadu, India; kingshyam2003@gmail.com

<sup>3</sup> Department of Botany and Microbiology, College of Science, King Saud University, Riyadh 11451, Saudi Arabia; pkaruppiyah@ksu.edu.sa

<sup>4</sup> Department of Chemistry, College of Science, King Saud University, P.O. Box 2455, Riyadh 11451, Saudi Arabia; kmujeeb@ksu.edu.sa

<sup>5</sup> School of Chemical Engineering, Yeungnam University, Gyeongsan 38541, Republic of Korea; shaikbaji@yu.ac.kr

\* Correspondence: siva.biotech@mkuniversity.ac.in (S.N.); mrshaik@ksu.edu.sa (M.R.S.)

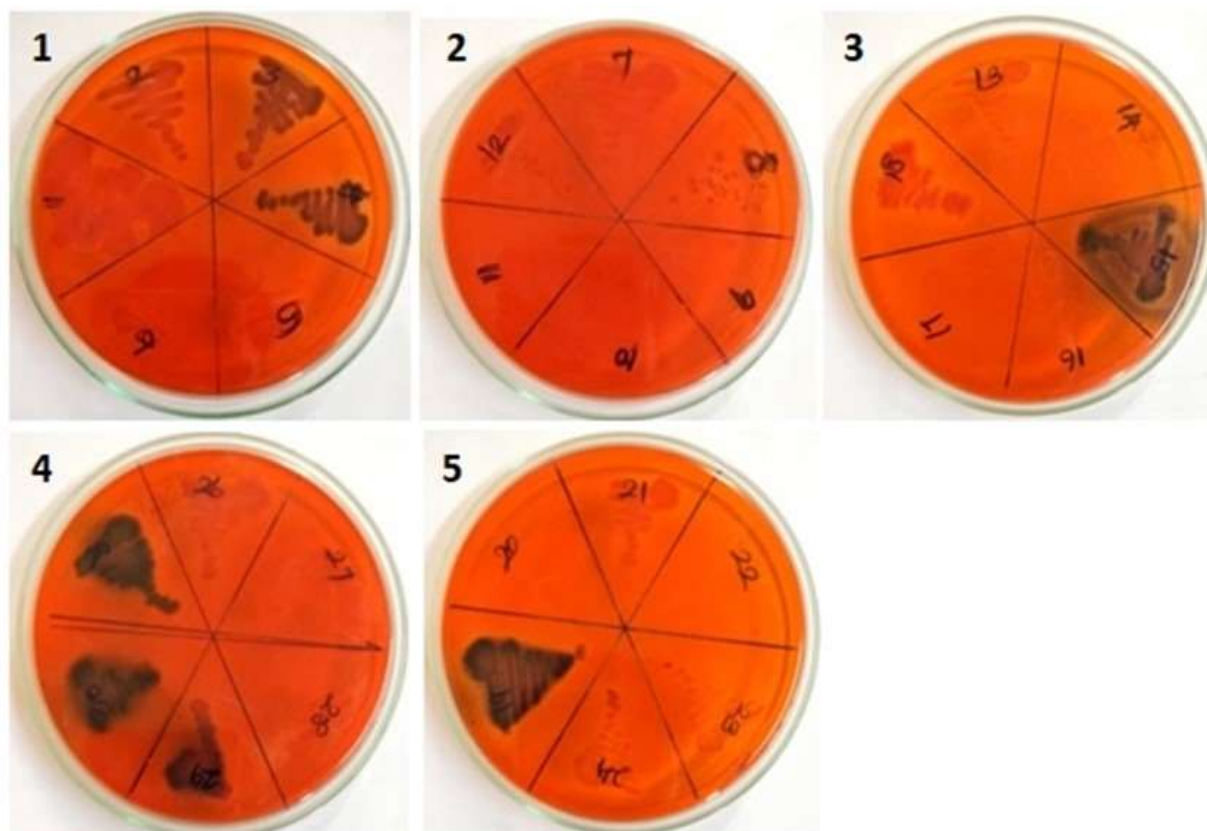

**Figure S1.** String test and Congo red agar plates showed EPS producing bacterial isolates.
